# Supplementary material for: Machine learning accelerated high-throughput screening of zeolites for the selective adsorption of xylene isomers
Source: Royal Society of Chemistry journal article supplement (doi:10.1039/d2sc03351h), 2022-01-01
Supplement: d2sc03351h1.pdf [file d2sc03351h1.pdf]

# Supporting information for "Machine learning accelerated high-throughput screening of zeolites for the selective adsorption of xylene isomers"

Daniel Hewitt,<sup>a\*</sup> Tom Pope,<sup>a</sup> Misbah Sarwar,<sup>b</sup> Alessandro Turrina<sup>c</sup> and Ben Slater<sup>a\*</sup>

October 10, 2022

## Contents

|                                                 |           |
|-------------------------------------------------|-----------|
| <b>1 Top performing hypothetical structures</b> | <b>2</b>  |
| 1.1 Comparison of MFI and MEL . . . . .         | 5         |
| 1.2 Loading and selectivity data . . . . .      | 7         |
| <b>2 Computational Details</b>                  | <b>7</b>  |
| 2.1 GCMC . . . . .                              | 7         |
| 2.2 Molecular Dynamics . . . . .                | 7         |
| <b>3 Neural Network details</b>                 | <b>10</b> |
| 3.1 Model architecture . . . . .                | 10        |
| 3.2 Classification model . . . . .              | 12        |
| 3.3 Regression model . . . . .                  | 13        |
| 3.4 Descriptors . . . . .                       | 13        |

*Corresponding authors: dan.hewitt.15@ucl.ac.uk, b.slater@ucl.ac.uk*

<sup>a</sup> Department of Chemistry, 20 Gordon Street, University College London, London, WC1E 6BT, UK

<sup>b</sup> Johnson Matthey Technology Centre, Sonning Common, Reading, RG4 9NH, UK

<sup>c</sup> Johnson Matthey Technology Centre, Chilton, P.O. Box 1, Belasis Avenue, Billingham, TS23 1LB, UK

# 1 Top performing hypothetical structures

All CIF and adsorption profile html files for the top eight performing hypothetical structures are available through this link. Loading and selectivity data is available in Tables 1 - 3.

We have included here the structures of the three top performing real and hypothetical structures, MFI, TON, and TER, as well as PCOD-8063931, -8321668, and -8330068.

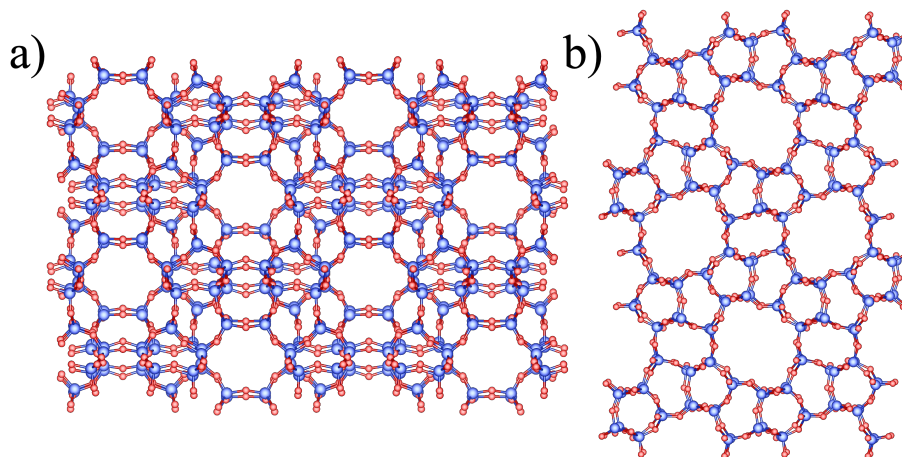

Figure 1: Structure of a supercell of the topology MFI viewed along the  $[1\ 0\ 0]$  and  $[0\ 1\ 0]$  axes respectively, rotated for ease of inspection. Silicon is shown in blue, and oxygen in red.

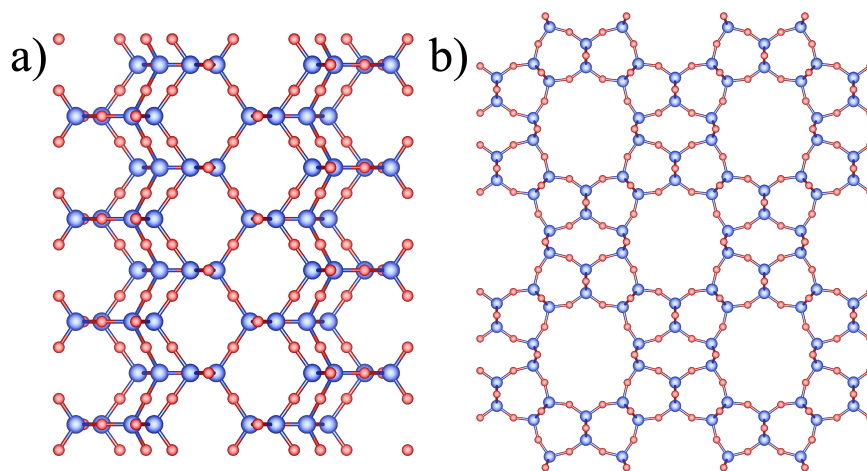

Figure 2: Structure of a supercell of the topology TON viewed along the  $[1\ 0\ 0]$  and  $[0\ 0\ 1]$  axes respectively, rotated for ease of inspection. Silicon is shown in blue, and oxygen in red.

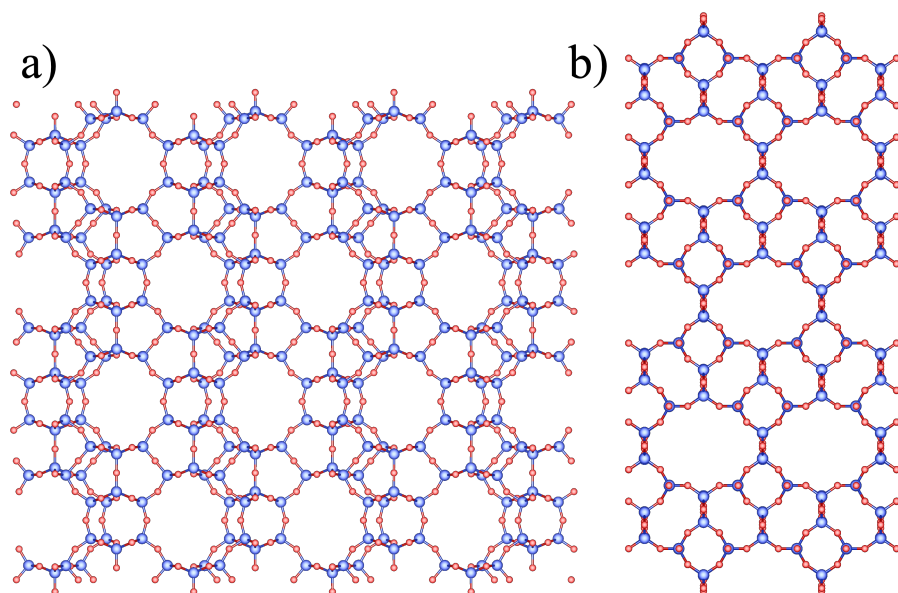

Figure 3: Structure of a supercell of the topology TER viewed along the  $[1\ 0\ 0]$  and  $[0\ 0\ 1]$  axes respectively, rotated for ease of inspection. Silicon is shown in blue, and oxygen in red.

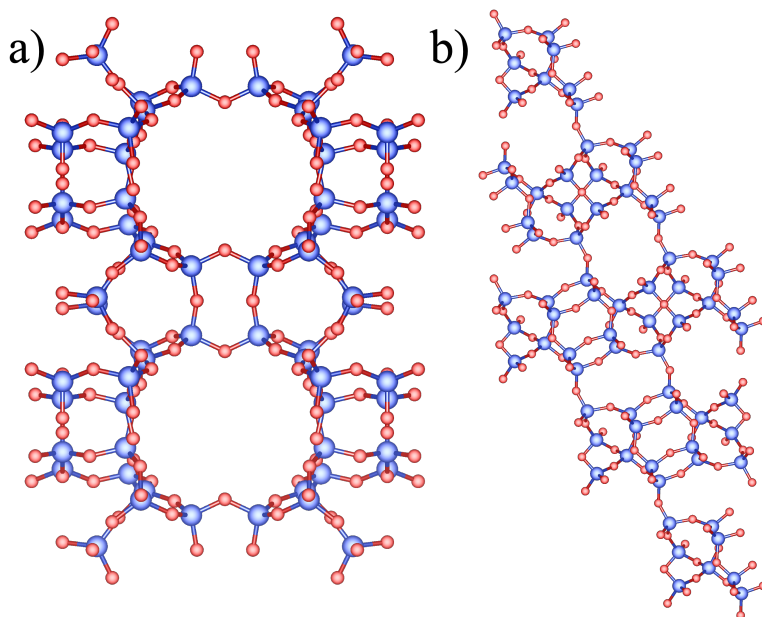

Figure 4: Structure of a supercell of the topology PCOD-8063931 viewed along the  $[1\ 0\ 0]$  and  $[0\ 1\ 0]$  axes respectively, rotated for ease of inspection. Silicon is shown in blue, and oxygen in red.

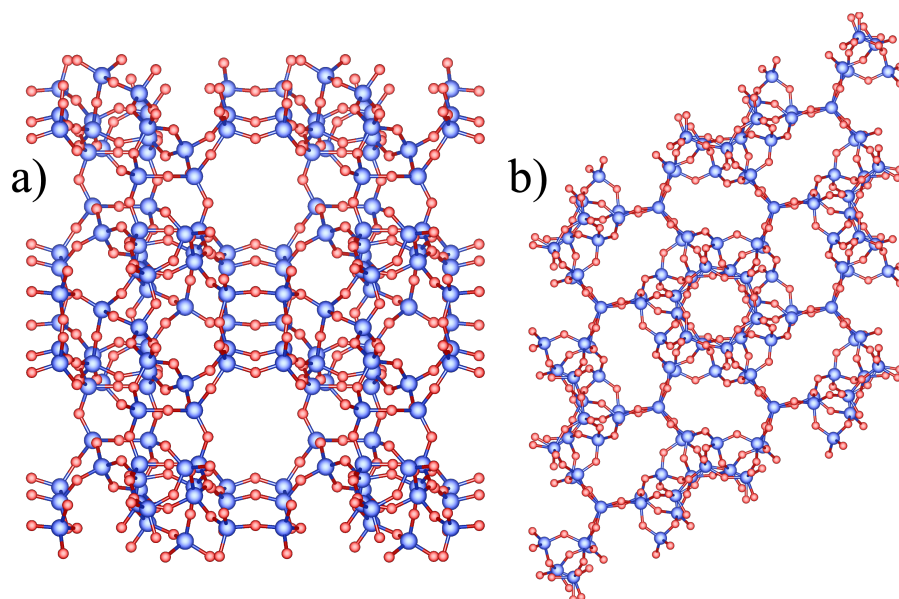

Figure 5: Structure of a supercell of the topology PCOD-8321668 viewed along the  $[0\ 1\ 0]$  and  $[0\ 0\ 1]$  axes respectively, rotated for ease of inspection. Silicon is shown in blue, and oxygen in red.

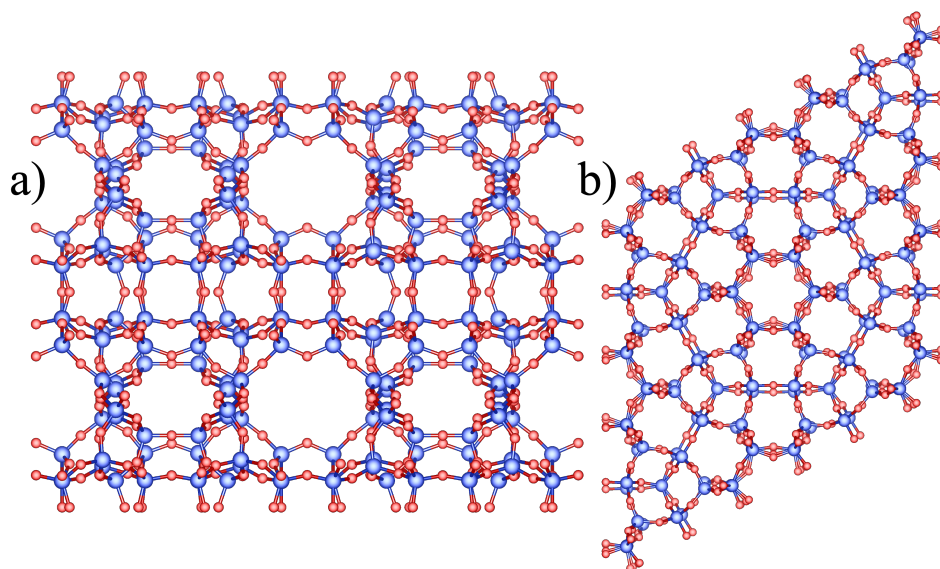

Figure 6: Structure of a supercell of the topology PCOD-8330068 viewed along the  $[0\ 1\ 0]$  and  $[0\ 0\ 1]$  axes respectively, rotated for ease of inspection. Silicon is shown in blue, and oxygen in red.

With respect to the three highest performing hypothetical structures shown in Figures 4, 5, and 6, the key structural feature responsible for the heightened performance of these frameworks is the shape of the channel network. In all three, sinusoidal channels are arranged in a hexagonal shape, allowing for the xylene ring to tightly fit at the intersections of the channel, with the methyl groups

pointing into the channels themselves. This finding is in good agreement with the results of Caro-Ortiz *et al.*[1] in their study of nine zeolite topologies. These adsorption patterns are shown clearly in the adsorption profiles available through this link.[2]

With reference to the known zeolite topologies studied, this hexagonal shaped channel structure is not present, which could be a deciding factor in the reduced selectivity for these frameworks. In MFI and TER, the multi dimensional channel network of sinusoidal channels allows for efficient packing of meta-xylene. Section 1 details how this particular channel network shape restricts the transport of meta-xylene in comparison to the other two isomers, and shows how MEL, a similar topology to MFI but with straight channels, shows a lower selectivity due to more favourable adsorption of para-xylene.

TON has a one dimensional channel system, and its adsorption behaviour is likewise dominated by its ability to preferentially accommodate meta-xylene in its sinusoidal channels. The shape of the channels allows optimal packing of meta-xylene, with an enthalpic penalty to the adsorption of para- and ortho-xylene in comparison. As seen in the main text of the article, some of the highest performing structures have one dimensional channel systems, whose improved selectivity over TON arises from a higher penalty to the adsorption of para-xylene, with more pronounced zig-zag patterns in the channel system.

## 1.1 Comparison of MFI and MEL

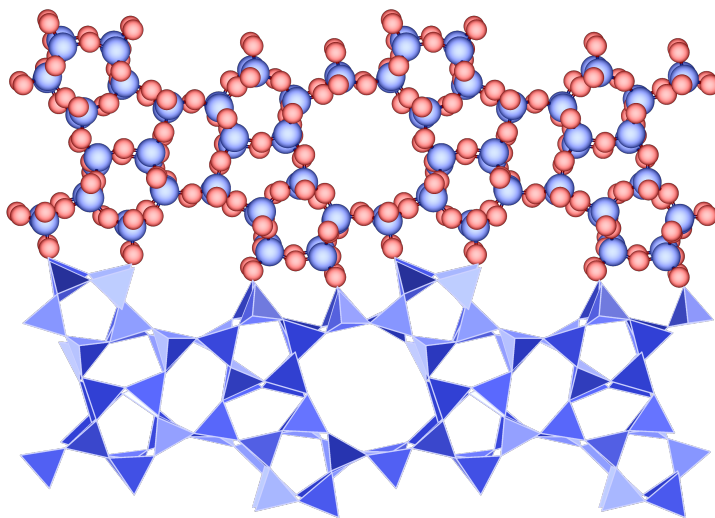

Figure 7: Structure of the siliceous form of the zeolite MFI shown as top) ball and stick form, atoms shown with their van der Waals radii and bottom) polyhedral form to show the silica tetrahedra. The structure is viewed along the [010] axis and shows a fragment cut from the extended solid. Silicon atoms and tetrahedra are shown in blue, and oxygen atoms are shown in red.

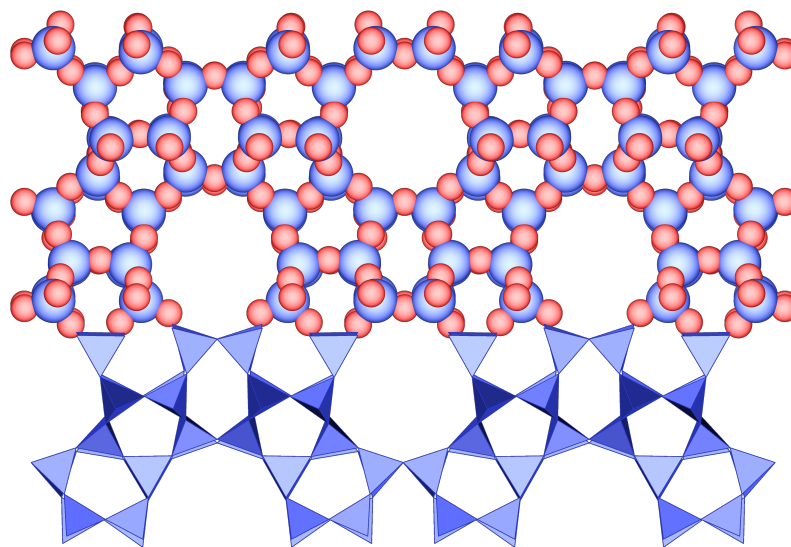

Figure 8: Structure of the siliceous form of the zeolite MEL shown as top) ball and stick form, atoms shown with their van der Waals radii and bottom) polyhedral form to show the silica tetrahedra. The structure is viewed along the [010] axis and shows a fragment cut from the extended solid. Silicon atoms and tetrahedra are shown in blue, and oxygen atoms are shown in red.

The two topologies MEL and MFI (see Figures 7 and 8 respectively) are both notable for having very similar structures, both being built from twelve unique tetrahedral (T) atoms (here, silicon). These twelve T atoms form pentasil layers; in MFI these layers are related by inversion, whereas in MEL they are related by mirroring. In MFI this gives rise to zig-zag channels parallel to the a axis, and straight channels parallel to the b axis, while in MEL this arrangement yields straight channels along the a and b axes. Due to the similarity between the two structures, it is worth asking the question as to why MFI showed such high selectivity in the meta-xylene isomerisation reaction, while MEL did not.

| Structure | Adsorbate    | Loading / mol kg <sup>-1</sup> |
|-----------|--------------|--------------------------------|
| MFI       | Ortho-xylene | 0.006                          |
|           | Meta-xylene  | 0.493                          |
|           | Para-xylene  | 0.029                          |
| MEL       | Ortho-xylene | 0.071                          |
|           | Meta-xylene  | 0.411                          |
|           | Para-xylene  | 0.164                          |

Table 1: Comparison of the adsorption behaviour of the three xylene isomers in the zeolites MFI and MEL.

The results from the CFC-MC calculations allowed for us to determine that both MFI and MEL showed similar loading values for both meta- and ortho-xylene, with the most remarkable difference in their adsorption behaviour coming from para-xylene. From Table 1 we can see that MEL was able to accommodate  $0.164 \text{ mol kg}^{-1}$  of para-xylene compared to the  $0.029 \text{ mol kg}^{-1}$  of MFI.

With reference to their structures, this difference can be rationalised by the channel shapes of the two materials. Similarly to the high-performing hypothetical materials we have examined, MFI’s zig-zag channel structure is able to allow the aromatic group of meta-xylene to adsorb strongly in the zig-zag nodes, with the methyl groups pointing into the edges. On the other hand, MEL has straight channels, and so is able to accommodate meta-xylene at channel intersections, but is also able to accommodate para-xylene favourably in the channels themselves. This difference in channel shape can thus be shown to be responsible for the difference in the materials’ performance, and shows how these structure-property relationships can be powerful tools in guiding synthesis for optimal catalysts.

## 1.2 Loading and selectivity data

# 2 Computational Details

## 2.1 GCMC

All RASPA files are available through [this link](#), showing examples of molecule files, force field files, pseudo atoms, and a simulation input file for the CFC-MC simulations.

## 2.2 Molecular Dynamics

Table 4 and 5 shows the tabulated results for the molecular dynamics simulations at 1223 K for the 2 and 3D hypothetical structures, as well as MFI. The order N MSD is shown in its raw form from the simulations whereas in the image in the main text it is  $\log_{10}$  transformed. These simulations were run 10 times for 100 nanoseconds each, and the mean of the MSD for these 10 runs is shown.

The structure which showed the greatest diffusion of para-xylene underwent further molecular dynamics simulations in order to determine a temperature at which its performance was equal to MFI’s performance at 1223 K. This is in order to give an estimate as to the percentage reduction in temperature that this structure would allow, while maintaining the same selectivity and activity as MFI. These simulations were run for 100 ns as well. Since the MSD of meta- and ortho-xylene was trivially low for these structures, we only sought to find structures with an MSD of para-xylene greater than that of MFI. 10 simulations per structure were run at temperatures from 1223 K downwards in steps of 100 K in order to find the lowest temperature at which these structures outperformed MFI.

| Framework Name | Loading / mol kg <sup>-1</sup> |             |             | Selectivity |
|----------------|--------------------------------|-------------|-------------|-------------|
|                | Ortho-xylene                   | Meta-xylene | Para-xylene |             |
| 8153395        | 0.000014                       | 0.208888    | 0.000059    | 2474.608439 |
| 8304211        | 0.000116                       | 0.287876    | 0.000013    | 1930.208854 |
| 8192542        | 0.00018                        | 0.206703    | 0.000111    | 613.88164   |
| 8234953        | 0.000252                       | 0.35198     | 0.000488    | 411.645143  |
| 8294334        | 0.000486                       | 0.247417    | 0.000085    | 375.628269  |
| 8326107        | 0.000066                       | 0.390116    | 0.000849    | 369.109618  |
| 8182279        | 0.000103                       | 0.205062    | 0.000431    | 332.268152  |
| 8234449        | 0.000448                       | 0.411077    | 0.000725    | 303.383217  |
| 8300828        | 0.001052                       | 0.457654    | 0.000372    | 278.08689   |
| 8324947        | 0.000602                       | 0.319269    | 0.000552    | 239.558114  |
| 8295817        | 0.000716                       | 0.47607     | 0.001259    | 208.690074  |
| 8162380        | 0.000782                       | 0.331849    | 0.000716    | 191.753047  |
| 8162607        | 0.0001                         | 0.232953    | 0.001271    | 147.117953  |
| 8118253        | 0.000797                       | 0.307366    | 0.001282    | 127.967274  |
| 8122465        | 0.000657                       | 0.290369    | 0.002341    | 83.856342   |
| 8134003        | 0.002213                       | 0.404361    | 0.002138    | 80.458176   |
| 8120915        | 0.00069                        | 0.304184    | 0.003002    | 71.326517   |
| 8282411        | 0.000333                       | 0.488563    | 0.005638    | 70.837163   |
| 8302163        | 0.000595                       | 0.353084    | 0.004132    | 64.654673   |
| 8078462        | 0.000109                       | 0.219843    | 0.002913    | 62.981747   |
| 8053163        | 0.000118                       | 0.216388    | 0.002898    | 62.110414   |
| 8082742        | 0.001642                       | 0.390675    | 0.004147    | 58.420401   |
| 8145624        | 0.000126                       | 0.307714    | 0.00447     | 57.968923   |
| 8133140        | 0.002131                       | 0.315188    | 0.002671    | 56.830297   |
| 8322162        | 0.000243                       | 0.325912    | 0.004928    | 54.554846   |
| 8140263        | 0.000185                       | 0.443176    | 0.007202    | 51.933992   |
| 8282410        | 0.000621                       | 0.520492    | 0.009114    | 46.283125   |

Table 2: Loading and Selectivity data for the top 81 structures.

The results are tabulated in Table 6.

Further reductions in temperatures resulted in a decrease in diffusion of para-xylene to below the level of MFI.



| Framework Name | Loading / mol kg <sup>-1</sup> |             |             | Selectivity |
|----------------|--------------------------------|-------------|-------------|-------------|
|                | Ortho-xylene                   | Meta-xylene | Para-xylene |             |
| 8174633        | 0.002748                       | 0.651516    | 0.010225    | 43.475637   |
| 8306225        | 0.00315                        | 0.230511    | 0.001568    | 42.291522   |
| 8067175        | 0.000157                       | 0.272368    | 0.005425    | 42.235367   |
| 8215189        | 0.0054                         | 0.435843    | 0.00467     | 37.467809   |
| 8151967        | 0.001862                       | 0.344797    | 0.006242    | 36.83276    |
| 8321505        | 0.001449                       | 0.444593    | 0.00974     | 34.397402   |
| 8083598        | 0.002056                       | 0.264578    | 0.004782    | 33.491981   |
| 8049254        | 0.002163                       | 0.201458    | 0.003086    | 33.219719   |
| 8300211        | 0.003216                       | 0.218026    | 0.002803    | 31.358043   |
| 8133318        | 0.001479                       | 0.259677    | 0.005707    | 31.281122   |
| 8193408        | 0.005251                       | 0.727923    | 0.015336    | 30.609195   |
| 8152865        | 0.001617                       | 0.353268    | 0.008417    | 30.478364   |
| 8306267        | 0.002093                       | 0.250628    | 0.006121    | 26.414858   |
| 8268546        | 0.005468                       | 0.444322    | 0.009228    | 26.173654   |
| 8319248        | 0.005046                       | 0.802721    | 0.021551    | 26.126475   |
| 8215101        | 0.009345                       | 0.386526    | 0.003469    | 26.112973   |
| 8321561        | 0.00131                        | 0.49329     | 0.015299    | 25.709922   |
| 8156815        | 0.000012                       | 0.253043    | 0.008651    | 25.285187   |
| 8095924        | 0.000526                       | 0.260718    | 0.008495    | 25.020291   |
| 8248315        | 0.005287                       | 0.527337    | 0.013171    | 24.731885   |
| 8133023        | 0.010438                       | 0.557299    | 0.009821    | 23.813724   |
| 8330068        | 0.000015                       | 0.206901    | 0.008258    | 21.649057   |
| 8227868        | 0.008304                       | 0.764767    | 0.023006    | 21.144626   |
| 8094730        | 0.005867                       | 0.466558    | 0.013384    | 20.979863   |
| 8295569        | 0.004903                       | 0.49243     | 0.015553    | 20.839083   |
| 8251803        | 0.011747                       | 0.296385    | 0.000602    | 20.775793   |
| 8301864        | 0.007939                       | 0.424809    | 0.010355    | 20.101336   |
| 8325754        | 0.002208                       | 0.257008    | 0.008894    | 20.039875   |
| 8281876        | 0.011068                       | 0.593275    | 0.01473     | 19.907405   |
| 8167472        | 0.000344                       | 0.440505    | 0.0194      | 19.314352   |

Table 3: Loading and Selectivity data for the top 81 structures continued.

| Framework Name | Loading / mol kg <sup>-1</sup> |             |             | Selectivity |
|----------------|--------------------------------|-------------|-------------|-------------|
|                | Ortho-xylene                   | Meta-xylene | Para-xylene |             |
| 8110796        | 0.000185                       | 0.215053    | 0.009587    | 19.051691   |
| 8224932        | 0.006748                       | 0.403402    | 0.012224    | 18.407627   |
| 8223024        | 0.002411                       | 0.242428    | 0.009395    | 17.775991   |
| 8063931        | 0.002522                       | 0.298706    | 0.012031    | 17.768086   |
| 8282464        | 0.00105                        | 0.228024    | 0.010185    | 17.569071   |
| 8215290        | 0.007571                       | 0.376143    | 0.011216    | 17.331906   |
| 8165995        | 0.024791                       | 1.122487    | 0.031313    | 17.319842   |
| 8133881        | 0.01558                        | 0.449831    | 0.007174    | 17.113904   |
| 8305940        | 0.0001                         | 0.400199    | 0.020355    | 16.936339   |
| 8143363        | 0.003123                       | 0.353286    | 0.01506     | 16.820071   |
| 8261866        | 0.004466                       | 0.503576    | 0.022418    | 16.214959   |
| 8181417        | 0.011329                       | 0.388987    | 0.009479    | 16.183015   |
| 8222628        | 0.000012                       | 0.23845     | 0.012905    | 15.980824   |
| 8321668        | 0.018459                       | 0.655294    | 0.017132    | 15.938586   |
| 8141101        | 0.001919                       | 0.371289    | 0.018276    | 15.915461   |
| 8232569        | 0.000645                       | 0.338938    | 0.01842     | 15.389991   |
| 8220059        | 0.002598                       | 0.32717     | 0.015864    | 15.340623   |
| 8165792        | 0.015447                       | 0.37037     | 0.005937    | 14.993763   |
| 8263582        | 0.000956                       | 0.319799    | 0.017526    | 14.979026   |
| 8253718        | 0.023967                       | 0.440155    | 0.001566    | 14.923222   |
| 8234885        | 0.009623                       | 0.488433    | 0.018749    | 14.903085   |
| 8217007        | 0.020038                       | 0.420665    | 0.004468    | 14.860196   |
| 8316000        | 0.00003                        | 0.285965    | 0.018269    | 13.527978   |
| 8230305        | 0.010306                       | 0.255288    | 0.00741     | 12.474505   |

Table 4: Loading and Selectivity data for the top 81 structures continued.

### 3 Neural Network details

#### 3.1 Model architecture

Both the classification and regression models were trained using the TensorFlow implementation of the Keras library.[3] Prior to training, 10% of the data was reserved as a test set, and 20% as validation data in order to implement early stopping to prevent overfitting to the training data. For the classification model, in both of these data splits stratified splitting was used in order to ensure

| Structure | Adsorbate | MSD / Å <sup>2</sup> |
|-----------|-----------|----------------------|
| MFI       | Ortho     | 1.7                  |
|           | Meta      | 2.1                  |
|           | Para      | 2263.9               |
| 8263582   | Ortho     | 3.5                  |
|           | Meta      | 130.1                |
|           | Para      | 34243.8              |
| 8063931   | Ortho     | 106.3                |
|           | Meta      | 32.3                 |
|           | Para      | 201976.4             |
| 8281876   | Ortho     | 1649.9               |
|           | Meta      | 18.6                 |
|           | Para      | 42468.0              |
| 8162380   | Ortho     | 1.0                  |
|           | Meta      | 1.4                  |
|           | Para      | 395.5                |
| 8330068   | Ortho     | 4.5                  |
|           | Meta      | 0.4                  |
|           | Para      | 52666.3              |
| 8268546   | Ortho     | 0.4                  |
|           | Meta      | 3.7                  |
|           | Para      | 2691.9               |
| 8261866   | Ortho     | 0.9                  |
|           | Meta      | 2.5                  |
|           | Para      | 53.8                 |
| 8321668   | Ortho     | 34.5                 |
|           | Meta      | 12.1                 |
|           | Para      | 53143.6              |
| 8324947   | Ortho     | 0.5                  |
|           | Meta      | 0.4                  |
|           | Para      | 2.3                  |

Table 5: MSD data for MFI and the 2D hypothetical structure's MD simulations at 1223 K, run for 100 ns.

| Structure | Adsorbate | MSD / Å <sup>2</sup> |
|-----------|-----------|----------------------|
| MFI       | Ortho     | 1.7                  |
|           | Meta      | 2.1                  |
|           | Para      | 2263.9               |
| 8165995   | Ortho     | 7.4                  |
|           | Meta      | 425.6                |
|           | Para      | 21188.8              |
| 8304211   | Ortho     | 0.6                  |
|           | Meta      | 1.3                  |
|           | Para      | 13126.1              |
| 8316000   | Ortho     | 0.7                  |
|           | Meta      | 0.7                  |
|           | Para      | 3.1                  |

Table 6: MSD data for MFI and the 3D hypothetical structure’s MD simulations at 1223 K, run for 100 ns.

| Temperature / K | MSD / Å <sup>2</sup> |
|-----------------|----------------------|
| 923             | 3393.1               |
| 823             | 2760.1               |
| 723             | 2112.0               |
| 623             | 1647.6               |

Table 7: MSD data for MD simulations of structure 8063931 in steps of 100 K for the self-diffusion of para-xylene.

that a representative number of highly selective structures were present in the training set. The data for both models was normalised prior to training using a Keras normalisation layer.

### 3.2 Classification model

The model contained 3 fully connected hidden layers with 949 neurons, each with batch normalisation, ‘relu’ activation, and dropout with a rate of 50%. This network was trained with binary cross-entropy as the cost function, with early stopping implemented when this metric stopped decreasing for the validation set. The Adam optimiser, which has been shown to be robust for a variety of cases, was used, along with a biased initialisation in order to reduce training times.[4]

In order to prevent overfitting of the model to the over-represented class, class weights were used

which allow the neural network to, in effect, pay more attention to the under represented class. Similarly, as batch training was used, the batch size was chosen to be sufficiently large so that each batch would likely contain structures from the under represented highly selective class.

### 3.3 Regression model

The regression model had a similar architecture to the classification model, but with 2 fully connected hidden layers each with 433 neurons. Similarly, each dense layer used batch normalisation, a 'relu' activation function, and dropout with a rate of 50%. The Huber loss was chosen as the loss function with the Nadam optimiser which is similar to the Adam optimiser used for classification but with Nesterov momentum.[5]

### 3.4 Descriptors

Topological descriptors were calculated using persistent homology. A similar workflow to the excellent work of Krishnapriyan *et al.*[6] was used, using Diode to generate the alpha shapes, then Dionysus 2 in order to calculate persistence diagrams. Finally PersIm was used to convert these into persistence images. We scaled our persistence images to a 50x50 resolution, scaled by the maximum birth and persistence values, as done in their work. We employed a sigma value (the spread of the Gaussian's transforming the persistence diagrams into persistence images) of  $\sigma = 0.2$ . For a more in-depth explanation of these descriptors we refer the reader to their work.[6]

PoreBlazer was used to calculate textural descriptors. An example of an output file from a PoreBlazer calculation for MFI is shown below, indicating the textural descriptors we used in our study for the training of neural networks.

Zeo++ was used to calculate the pore limiting diameter and largest cavity diameter for the initial screening of structures based on their PLD being greater than 4 Å. These values were also used as descriptors for training the neural networks.

## References

- [1] Ortiz, S. C., Zuidema, E., Rigutto, M., Dubbeldam, D. & Vlugt, T. J. Competitive adsorption of xylenes at chemical equilibrium in zeolites. *Journal of Physical Chemistry C* **125**, 4155–4174 (2021). URL <https://pubs.acs.org/doi/abs/10.1021/acs.jpcc.0c09411>.
- [2] Hewitt, D. Adsorption Profiles. URL <https://github.com/d4n-hewitt/d4n-hewitt>.
- [3] Abadi, M. *et al.* TensorFlow: Large-scale machine learning on heterogeneous systems (2015). URL <https://www.tensorflow.org/>. Software available from tensorflow.org.

| Descriptor        | Value     | Explanation                                               |
|-------------------|-----------|-----------------------------------------------------------|
| $V_A^3$           | 41690.253 | Volume of the system, $V, \text{\AA}^3$                   |
| M.g/mol           | 46145.280 | Molecular weight of the unit cell, g/mol                  |
| $RHO_g/cm^3$      | 1.838     | Density, g/cm <sup>3</sup>                                |
| PLD_A             | 4.00      | Pore limiting diameter, $\text{\AA}$                      |
| LCD_A             | 5.66      | Largest cavity diameter, $\text{\AA}$                     |
| D                 | 1         | Number of directions the system is percolated in          |
| $S_{AC}_A^2$      | 10759.84  | Accessible surface area, $S(AC, T), \text{\AA}^2$         |
| $S_{AC}_m^2/cm^3$ | 2580.90   | Accessible surface area, $S(AC, T), m^2/cm^3$             |
| $S_{AC}_m^2/g$    | 1404.20   | Accessible surface area, $S(AC, T), m^2/g$                |
| $V_{He}_A^3$      | 11042.451 | Helium pore volume, $V(He, T), \text{\AA}^3$              |
| $V_{He}_cm^3/g$   | 0.144     | Helium pore volume, $V(He, T), cm^3/g$                    |
| $V_G^3$           | 17695.910 | Geometric pore volume, $V(G, T), \text{\AA}^3$            |
| $V_Gcm^3/g$ :     | 0.231     | Geometric pore volume, $V(G, T), cm^3/g$                  |
| $V_{POA}^3$ :     | 16993.383 | Probe-occupiable pore volume, $V(PO, T), \text{\AA}^3$    |
| $V_{PO}cm^3/g$ :  | 0.222     | Probe-occupiable volume, $V(PO, T), cm^3/g$               |
| FV_PO:            | 0.40761   | Volume fraction, $V(PO, T)/V$                             |
| $S_{AC}_A^2$      | 10455.33  | Network-accessible surface area, $S(AC, A), \text{\AA}^2$ |
| $S_{AC}_m^2/cm^3$ | 2507.86   | Network-accessible surface area, $S(AC, A), m^2/cm^3$     |
| $S_{AC}_m^2/g$    | 1364.46   | Network-accessible surface area, $S(AC, A), m^2/g$        |

Table 8: PoreBlazer output file with explanations

- [4] Kingma, D. P. & Ba, J. L. Adam: A method for stochastic optimization. In *3rd International Conference on Learning Representations, ICLR 2015 - Conference Track Proceedings* (International Conference on Learning Representations, ICLR, 2015). URL <https://arxiv.org/abs/1412.6980v9>. 1412.6980.
- [5] Dozat, T. Incorporating Nesterov Momentum into Adam. *ICLR Workshop 2013-2016* (2016). URL <http://matmahoney.net/dc/text8.zip>.
- [6] Krishnapriyan, A. S., Haranczyk, M. & Morozov, D. Topological Descriptors Help Predict Guest Adsorption in Nanoporous Materials. *The Journal of Physical Chemistry C* **124**, 9360–9368 (2020). URL <https://pubs.acs.org/doi/full/10.1021/acs.jpcc.0c01167>. 2001.05972.
